# Supplementary material
Source: PubMed Central journal article supplement (PMC3557645)

**Table S1. Runx1-bound genes deregulated in the peripheral blood of *Cbfb*<sup>+/-</sup>*C95* embryos**

| Fold Change | Symbol        | Entrez Gene Name                                                                      | Deregulated in <i>Cbfb</i> <sup>-/-</sup> embryos <sup>4</sup> | Deregulated in Runx1 KD MEL cells <sup>25</sup> | Deregulated in <i>Runx1</i> KD K562 cells <sup>26</sup> |
|-------------|---------------|---------------------------------------------------------------------------------------|----------------------------------------------------------------|-------------------------------------------------|---------------------------------------------------------|
| 2.726       | 1600029D21Rik | RIKEN cDNA 1600029D21 gene                                                            |                                                                |                                                 |                                                         |
| -7.459      | ABCA1         | ATP-binding cassette, sub-family A (ABC1), member 1                                   |                                                                |                                                 |                                                         |
| -2.022      | ACADM         | acyl-CoA dehydrogenase, C-4 to C-12 straight chain                                    |                                                                |                                                 |                                                         |
| -2.526      | ACAP2         | ArfGAP with coiled-coil, ankyrin repeat and PH domains 2                              |                                                                |                                                 |                                                         |
| -2.216      | ACSL1         | acyl-CoA synthetase long-chain family member 1                                        |                                                                |                                                 | yes                                                     |
| -2.31       | ACTR3         | ARP3 actin-related protein 3 homolog (yeast)                                          |                                                                |                                                 |                                                         |
| -2.613      | AFF4          | AF4/FMR2 family, member 4                                                             | yes                                                            |                                                 |                                                         |
| -4.329      | ALOX5AP       | arachidonate 5-lipoxygenase-activating protein                                        |                                                                | yes                                             |                                                         |
| -3.202      | ANKRD13C      | ankyrin repeat domain 13C                                                             |                                                                |                                                 |                                                         |
| -2.032      | ARHGEF12      | Rho guanine nucleotide exchange factor (GEF) 12                                       |                                                                |                                                 |                                                         |
| -2.309      | ASPM          | asp (abnormal spindle) homolog, microcephaly associated (Drosophila)                  |                                                                | yes                                             |                                                         |
| -2.066      | B3GALNT1      | beta-1,3-N-acetylgalactosaminyltransferase 1 (globoside blood group)                  |                                                                |                                                 |                                                         |
| -2.24       | BNIP3L        | BCL2/adenovirus E1B 19kDa interacting protein 3-like                                  |                                                                |                                                 |                                                         |
| -2.572      | CCL2          | chemokine (C-C motif) ligand 2                                                        |                                                                |                                                 | yes                                                     |
| -3.117      | Ccl9          | chemokine (C-C motif) ligand 9                                                        | yes                                                            |                                                 |                                                         |
| -2.409      | CCNG2         | cyclin G2                                                                             |                                                                | yes                                             |                                                         |
| -2.467      | CCNL1         | cyclin L1                                                                             |                                                                |                                                 |                                                         |
| -2.256      | CCR1          | chemokine (C-C motif) receptor 1                                                      |                                                                |                                                 |                                                         |
| -2.22       | CD47          | CD47 molecule                                                                         |                                                                |                                                 |                                                         |
| -2.497      | CD48          | CD48 molecule                                                                         |                                                                |                                                 |                                                         |
| -5.261      | CD53          | CD53 molecule                                                                         | yes                                                            | yes                                             | yes                                                     |
| -2.076      | CITED2        | Cbp/p300-interacting transactivator, with Glu/Asp-rich carboxy-terminal domain, 2     |                                                                | yes                                             |                                                         |
| -3.721      | CMTM7         | CKLF-like MARVEL transmembrane domain containing 7                                    |                                                                | yes                                             |                                                         |
| -2.505      | COTL1         | coactosin-like 1 (Dictyostelium)                                                      |                                                                |                                                 |                                                         |
| -2.447      | CPA3          | carboxypeptidase A3 (mast cell)                                                       | yes                                                            |                                                 |                                                         |
| -2.20       | CPEB4         | cytoplasmic polyadenylation element binding protein 4                                 |                                                                | yes                                             |                                                         |
| -2.195      | CREG1         | cellular repressor of E1A-stimulated genes 1                                          |                                                                |                                                 |                                                         |
| -2.059      | CSNK1G3       | casein kinase 1, gamma 3                                                              |                                                                |                                                 |                                                         |
| -6.338      | CTSS          | cathepsin S                                                                           | yes                                                            |                                                 |                                                         |
| -2.361      | DAPP1         | dual adaptor of phosphotyrosine and 3-phosphoinositides                               | yes                                                            |                                                 |                                                         |
| -2.076      | DCUN1D1       | DCN1, defective in cullin neddylation 1, domain containing 1 ( <i>S. cerevisiae</i> ) |                                                                |                                                 |                                                         |

|        |        |                                                                                                       |     |     |     |
|--------|--------|-------------------------------------------------------------------------------------------------------|-----|-----|-----|
| -2.286 | EDEM3  | ER degradation enhancer, mannosidase alpha-like 3                                                     |     |     |     |
| -2.885 | ELF1   | E74-like factor 1 (ets domain transcription factor)                                                   |     |     |     |
| -2.199 | ELL2   | elongation factor, RNA polymerase II, 2                                                               |     |     |     |
| -2.230 | EMB    | embigin                                                                                               |     |     |     |
| -3.061 | EMR1   | egf-like module containing, mucin-like, hormone receptor-like 1                                       |     |     |     |
| -2.008 | EPC2   | enhancer of polycomb homolog 2 (Drosophila)                                                           |     |     |     |
| -2.26  | EVI5   | ecotropic viral integration site 5                                                                    |     |     |     |
| -2.123 | F2R    | coagulation factor II (thrombin) receptor                                                             |     |     |     |
| -2.081 | FAHD1  | fumarylacetoacetate hydrolase domain containing 1                                                     |     |     |     |
| -2.319 | FAM13B | family with sequence similarity 13, member B                                                          |     |     |     |
| -3.433 | FCER1G | Fc fragment of IgE, high affinity I, receptor for; gamma polypeptide                                  | yes |     |     |
| -4.935 | Fcrls  | Fc receptor-like S, scavenger receptor                                                                | yes |     |     |
| -2.197 | FNDC3B | fibronectin type III domain containing 3B                                                             |     |     |     |
| -2.116 | FRMD4A | FERM domain containing 4A                                                                             |     |     |     |
| -2.323 | FRMD4B | FERM domain containing 4B                                                                             |     |     |     |
| -2.576 | FYB    | FYN binding protein                                                                                   | yes | yes |     |
| -2.008 | GLIPR1 | GLI pathogenesis-related 1                                                                            |     |     |     |
| -4.709 | Ifitm3 | interferon induced transmembrane protein 3                                                            |     |     |     |
| -2.357 | ITGA6  | integrin, alpha 6                                                                                     |     |     |     |
| -2.057 | ITGAL  | integrin, alpha L (antigen CD11A (p180), lymphocyte function-associated antigen 1; alpha polypeptide) |     | yes |     |
| -2.212 | ITM2B  | integral membrane protein 2B                                                                          |     |     | yes |
| -3.67  | KLF6   | Kruppel-like factor 6                                                                                 | yes |     | yes |
| -2.498 | KTN1   | kinectin 1 (kinesin receptor)                                                                         |     |     |     |
| -4.307 | LAPTM5 | lysosomal protein transmembrane 5                                                                     | yes |     |     |
| -2.352 | LCP1   | lymphocyte cytosolic protein 1 (L-plastin)                                                            |     | yes |     |
| -4.397 | LIMD2  | LIM domain containing 2                                                                               |     |     |     |
| -2.27  | LIMS1  | LIM and senescent cell antigen-like domains 1                                                         |     |     |     |
| -2.304 | LPIN2  | lipin 2                                                                                               |     |     |     |
| -2.758 | LRRC33 | leucine rich repeat containing 33                                                                     | yes |     |     |
| -3.330 | LY86   | lymphocyte antigen 86                                                                                 |     |     |     |
| -3.70  | MALAT1 | metastasis associated lung adenocarcinoma transcript 1 (non-protein coding)                           | yes |     |     |
| 2.24   | MCM5   | minichromosome maintenance complex component 5                                                        | yes |     | yes |
| -2.041 | MEF2C  | myocyte enhancer factor 2C                                                                            |     |     |     |
| -5.727 | MPO    | myeloperoxidase                                                                                       | yes |     |     |
| -3.562 | MYB    | v-myb myeloblastosis viral oncogene homolog (avian)                                                   | yes | yes |     |

|        |          |                                                                                       |     |     |
|--------|----------|---------------------------------------------------------------------------------------|-----|-----|
| -2.006 | MYO1F    | myosin IF                                                                             |     |     |
| -2.051 | NRIP1    | nuclear receptor interacting protein 1                                                |     |     |
| -2.36  | OGFRL1   | opioid growth factor receptor-like 1                                                  | yes |     |
| -2.999 | P2RY6    | pyrimidineric receptor P2Y, G-protein coupled, 6                                      | yes |     |
| -2.198 | PDCD4    | programmed cell death 4 (neoplastic transformation inhibitor)                         |     |     |
| -2.621 | PELI1    | pellino E3 ubiquitin protein ligase 1                                                 |     |     |
| -4.431 | PF4      | platelet factor 4                                                                     | yes | yes |
| -2.076 | PHF20L1  | PHD finger protein 20-like 1                                                          |     |     |
| 2.023  | PHLDA1   | pleckstrin homology-like domain, family A, member 1                                   | yes |     |
| -2.34  | PIP4K2A  | phosphatidylinositol-5-phosphate 4-kinase, type II, alpha                             |     | yes |
| -4.31  | PLEK     | pleckstrin                                                                            | yes |     |
| -2.23  | PPM1A    | protein phosphatase, Mg <sup>2+</sup> /Mn <sup>2+</sup> dependent, 1A                 | yes |     |
| -2.10  | PPP1R12A | protein phosphatase 1, regulatory subunit 12A                                         |     |     |
| -2.436 | PPP3CA   | protein phosphatase 3, catalytic subunit, alpha isozyme                               |     |     |
| -2.317 | PRKAR2B  | protein kinase, cAMP-dependent, regulatory, type II, beta                             |     |     |
| -3.138 | PROKR1   | prokineticin receptor 1                                                               | yes |     |
| -2.06  | PTPN12   | protein tyrosine phosphatase, non-receptor type 12                                    |     |     |
| -2.447 | RAB8B    | RAB8B, member RAS oncogene family                                                     |     |     |
| -2.428 | RALA     | v-ral simian leukemia viral oncogene homolog A (ras related)                          |     |     |
| -2.124 | RALBP1   | ralA binding protein 1                                                                |     |     |
| -2.129 | RAPGEF6  | Rap guanine nucleotide exchange factor (GEF) 6                                        |     |     |
| -2.114 | RCBTB2   | regulator of chromosome condensation (RCC1) and BTB (POZ) domain containing protein 2 | yes |     |
| -2.121 | RHOB     | ras homolog family member B                                                           |     |     |
| -2.265 | RICTOR   | RPTOR independent companion of MTOR, complex 2                                        |     |     |
| -2.481 | RNF130   | ring finger protein 130                                                               |     |     |
| -4.113 | RTP4     | receptor (chemosensory) transporter protein 4                                         |     |     |
| -2.547 | SH3GLB1  | SH3-domain GRB2-like endophilin B1                                                    |     |     |
| -3.372 | SLC18A2  | solute carrier family 18 (vesicular monoamine), member 2                              | yes | yes |
| -2.282 | SLC2A1   | solute carrier family 2 (facilitated glucose transporter), member 1                   |     |     |
| -2.071 | SLC2A1   | solute carrier family 2 (facilitated glucose transporter), member 1                   |     |     |
| -2.241 | SLC38A2  | solute carrier family 38, member 2                                                    |     | yes |
| -2.147 | SLMAP    | sarcolemma associated protein                                                         |     |     |
| -5.188 | SOX4     | SRY (sex determining region Y)-box 4                                                  | yes |     |
| -3.455 | SRGN     | serglycin                                                                             | yes | yes |
| 2.037  | SRM      | spermidine synthase                                                                   | yes | yes |

|        |         |                                                                       |     |     |     |
|--------|---------|-----------------------------------------------------------------------|-----|-----|-----|
| -2.458 | ST6GAL1 | ST6 beta-galactosamide alpha-2,6-sialyltransferase 1                  |     |     | yes |
| -2.609 | TAX1BP1 | Tax1 (human T-cell leukemia virus type I) binding protein 1           |     |     |     |
| -2.31  | TBCEL   | tubulin folding cofactor E-like                                       |     |     |     |
| -2.278 | TGFBI   | transforming growth factor, beta-induced, 68kDa                       |     |     |     |
| -2.30  | TMEM30A | transmembrane protein 30A                                             |     |     |     |
| -2.027 | TNFAIP2 | tumor necrosis factor, alpha-induced protein 2                        |     |     |     |
| -2.426 | TOB1    | transducer of ERBB2, 1                                                |     |     |     |
| -2.280 | TRAK2   | trafficking protein, kinesin binding 2                                | yes |     |     |
| -2.736 | TREML2  | triggering receptor expressed on myeloid cells-like 2                 | yes |     |     |
| -9.284 | TYROBP  | TYRO protein tyrosine kinase binding protein                          | yes |     | yes |
| -2.066 | Unkl    | unkempt-like (Drosophila)                                             | yes | yes |     |
| -2.116 | Zrsr1   | zinc finger (CCCH type), RNA binding motif and serine/arginine rich 1 |     |     |     |

The chromatin immunoprecipitation sequencing data from Wilson, et al. (Cell Stem Cell 7:532, 2010) was used to determine which differentially expressed genes in *Cbfb*<sup>+/-C95</sup> mice are bound by Runx1. In addition, the indicated published gene expression datasets from other models of decreased Runx1 activity were queried to determine if individual genes showed deregulated expression in other studies. Genes that showed >2 fold change, and p< .05 in each study are indicated with a “yes”. KD= Knockdown.

## Supplemental Figure Legends

**Kamikubo et al., “The C-terminal of CBF $\beta$ -SMMHC is required for its dominant negative activity and leukemogenesis”**

**Figure S1. The C-terminal 95 amino acids of CBF $\beta$ -SMMHC are required for primitive blood differentiation defects.** Bar graphs of (A) Ter119 and C-Kit and (B) Csf2rb staining of primitive blood cells from E10.5 embryos of the indicated genotypes and indicated lines. \* indicates a statistically significant difference ( $p < .05$ ) as compared to wildtype littermate embryos.  $N \geq 3$  for all genotypes for both lines. (C) Colony assays with fetal liver (FL) cells from embryos of the indicated genotypes at E12.5. FL cells from *Cbfb*<sup>+/ $\Delta$ C95</sup> embryos gave rise to similar numbers of colonies (both total and different lineages) as those from wildtype embryos. On the other hand, FL cells from *Cbfb*<sup>+/*MYH11*</sup> embryos produced very few to no colonies.  $N \geq 3$  for all genotypes.

**Figure S2. Increased Mac1/Gr1 double positive cells in peripheral blood (PB) from aged *Cbfb*<sup>+/ $\Delta$ C95</sup> mice.** (A) PB Mac1/Gr1 double positive cell percentage in mice from line #2 1 -1.5 years of age. (B) Representative PB FACS staining of Mac1 and Gr1.

**Figure S3. Increased myelopoiesis in the bone marrow and spleen in adult *Cbfb*<sup>+/ $\Delta$ C95</sup> mice.** H&E stained bone marrow and spleen sections from adult *Cbfb*<sup>+/ $\Delta$ C95</sup> mice.

**Figure S4. Increased colony forming activity in bone marrow cells from adult *Cbfb*<sup>+/ $\Delta$ C95</sup> mice.** Bar graph showing (A) total colony number and (B) percentage of the indicated colony types from in vitro differentiation of bone marrow cells from mice of the indicated genotype. p values are shown. NS= not significant. N=3 for each genotype.

**Figure S5. Infiltration of myeloid cells in liver and kidney in adult *Cbfb*<sup>+/ $\Delta$ C95</sup> mice.** H&E stained histological sections of the indicated organs from adult mice of the indicated genotypes. Black arrows indicate infiltrated myeloid cells.

Figure S1

A

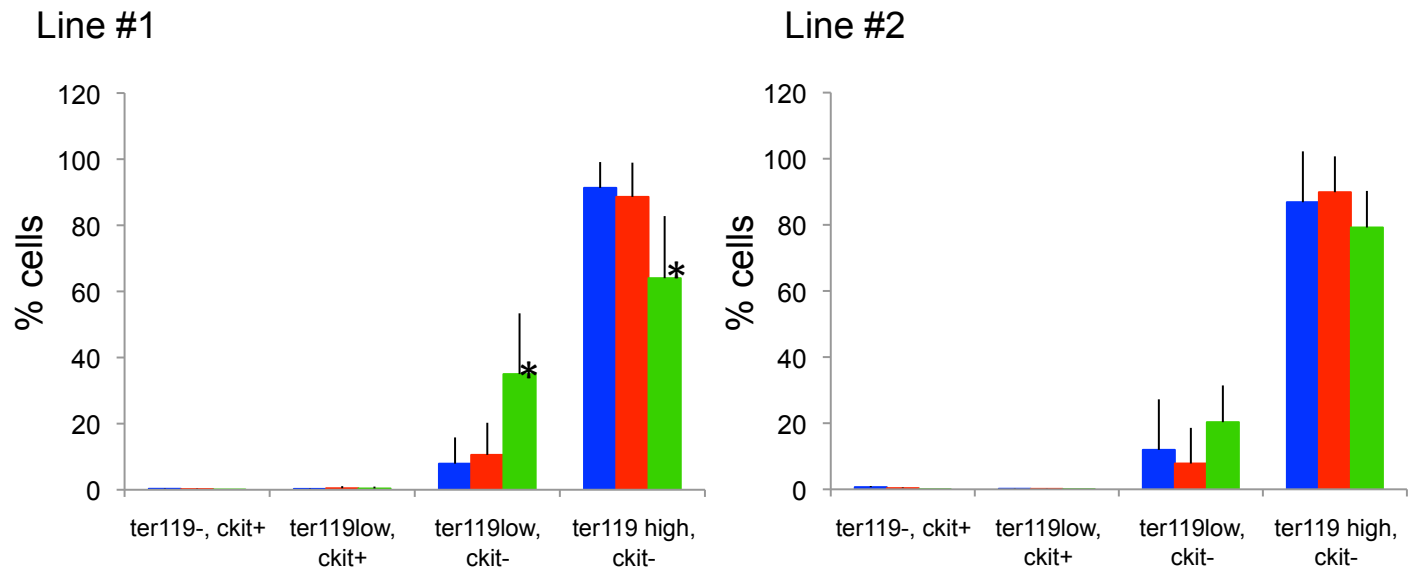

B

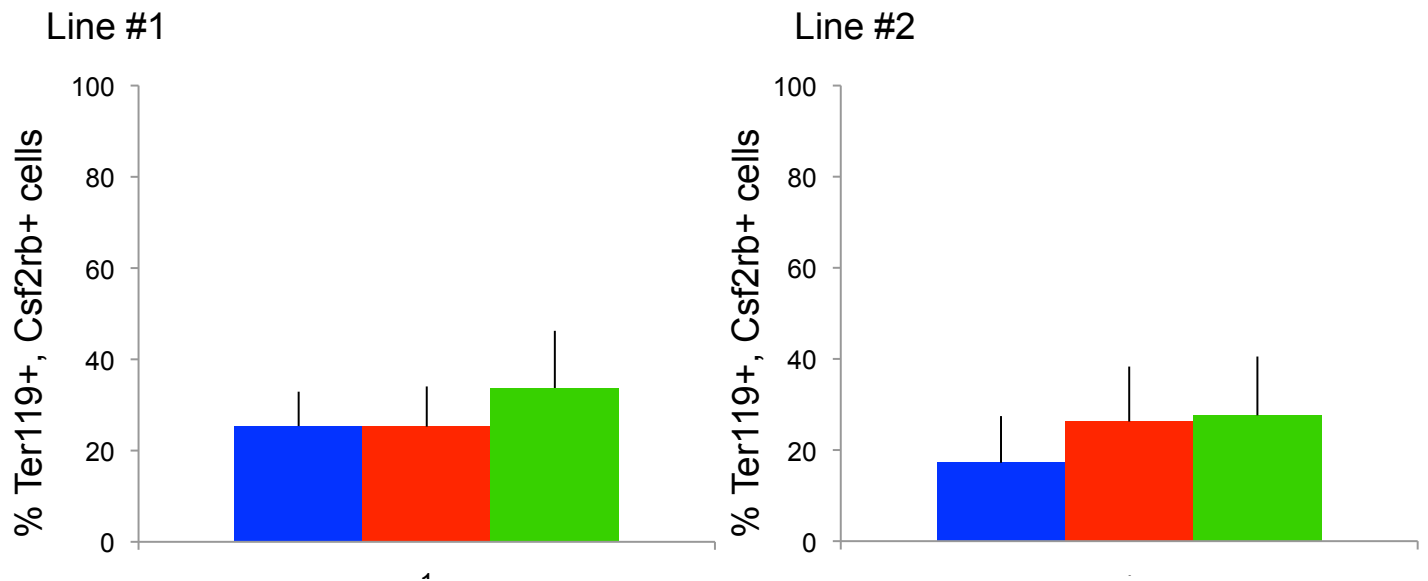

■ Cbfb<sup>+/+</sup>  
■ Cbfb<sup>+/ $\Delta$ C95</sup>  
■ Cbfb <sup>$\Delta$ C95/ $\Delta$ C95</sup>

Figure S1

C

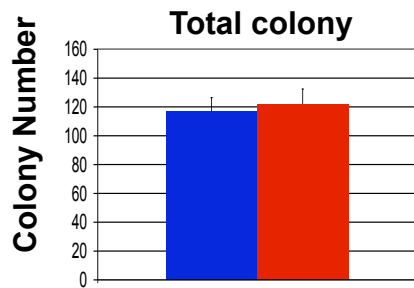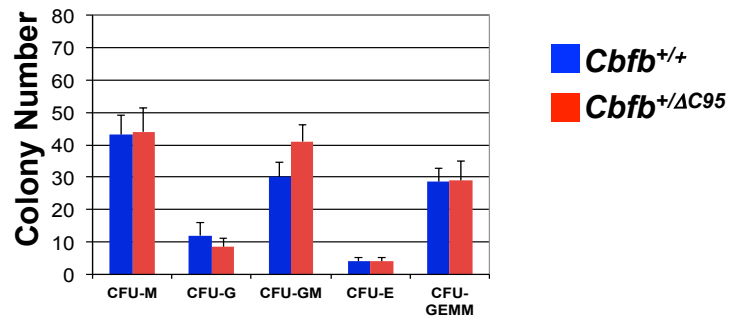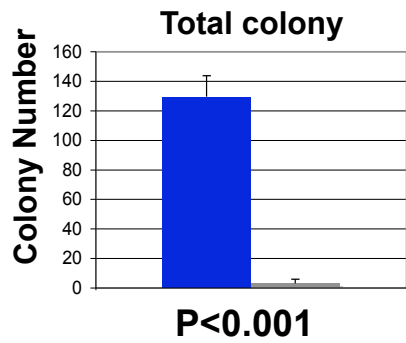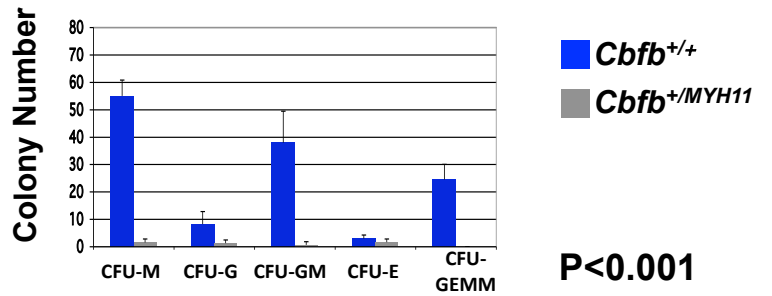



Figure S2

A

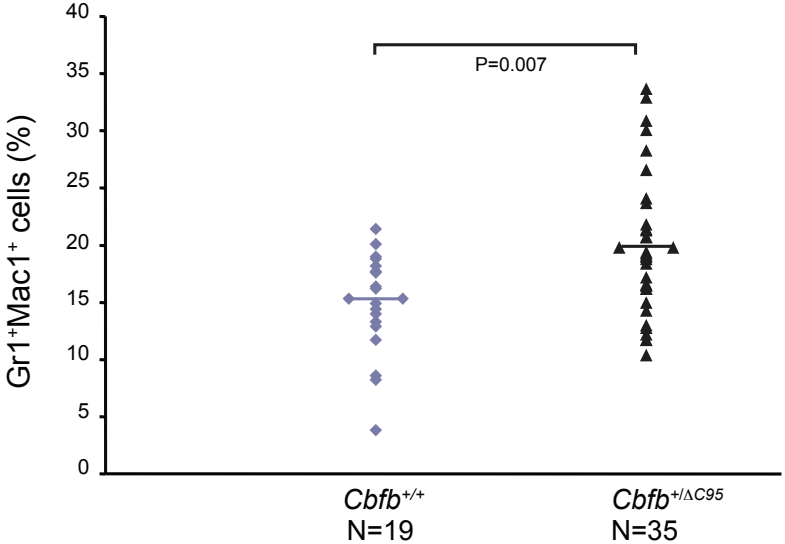

B

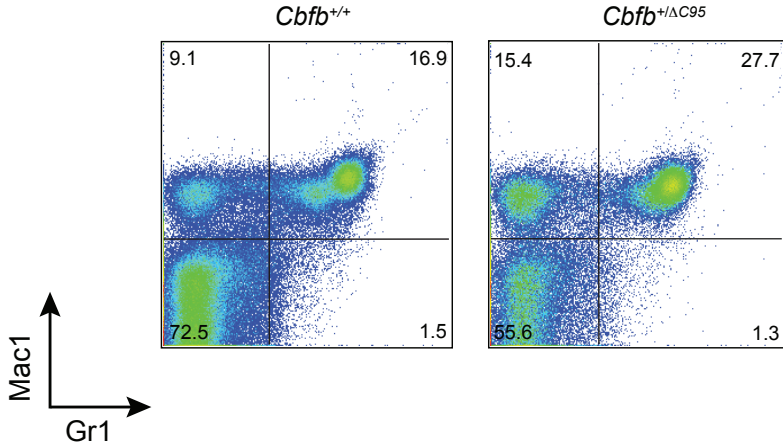

Figure S3

BM

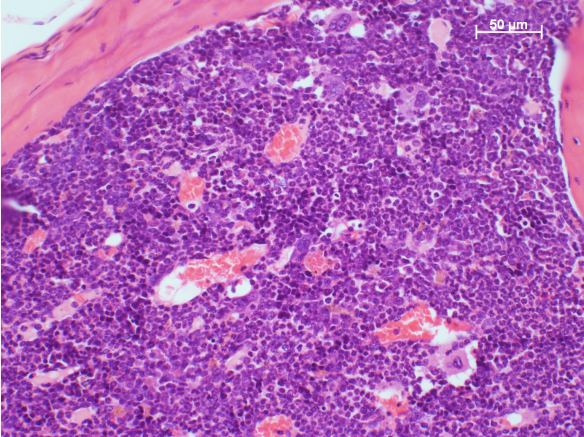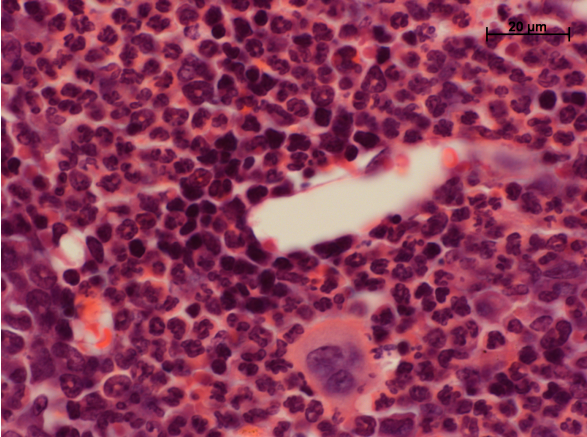

Spleen

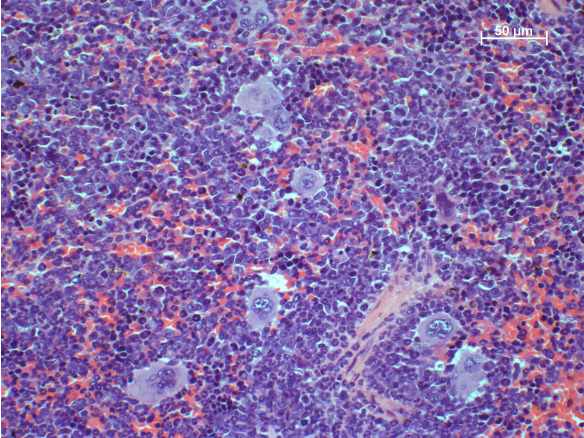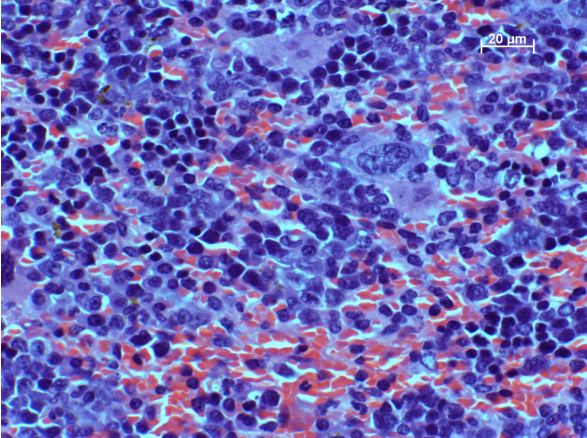

Figure S4

A

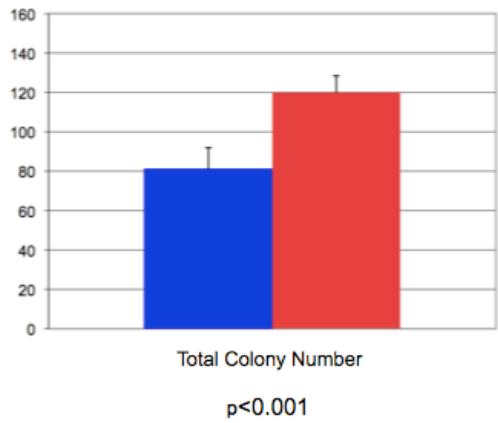

B

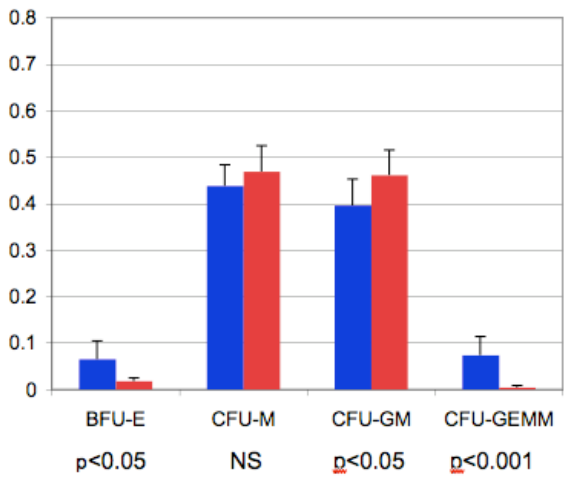

■ *Cbfb*<sup>+/+</sup>  
■ *Cbfb*<sup>+/ΔC95</sup>

Figure S5

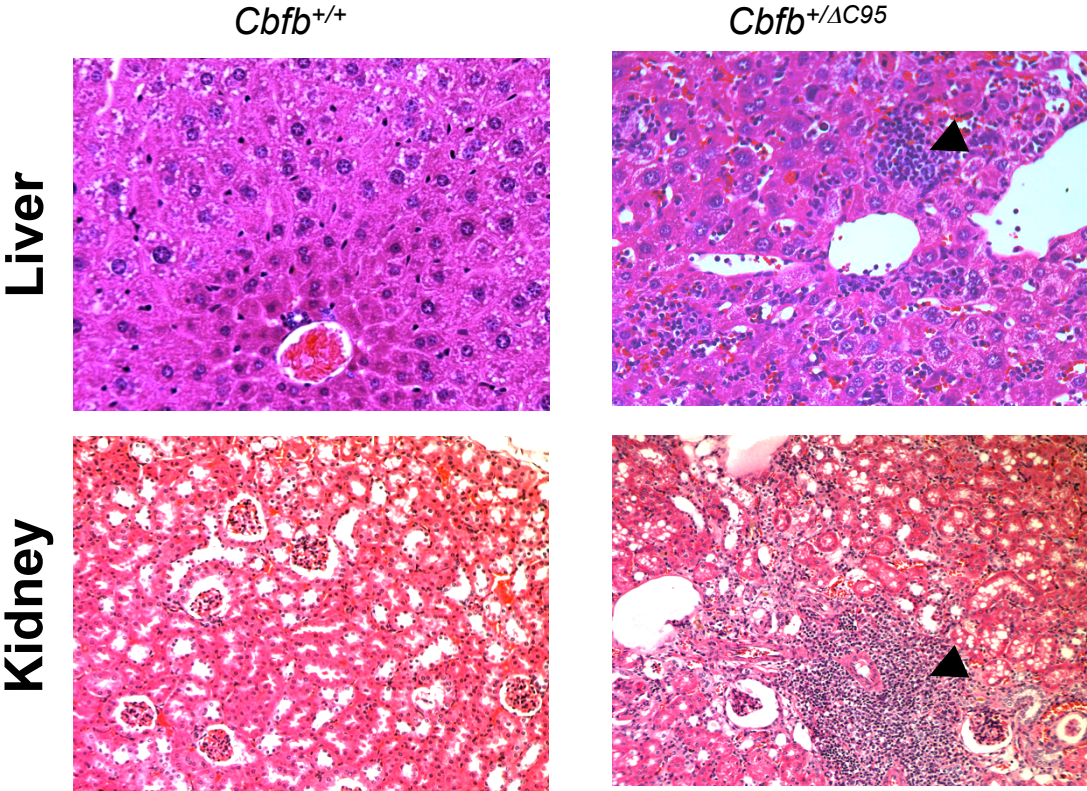

Supplement: supp_blood-2012-06-434688_blood-2012-06-434688-1.pdf [file supp_blood-2012-06-434688_blood-2012-06-434688-1.pdf]
